# Supplementary material for: Fabrication of an Ag/Fe2O3/ZnO ternary composite with enhanced photocatalytic performance
Source: Royal Society of Chemistry journal article supplement (doi:10.1039/c5ra20403h), 2015-12-15
Supplement: c5ra20403h1.pdf [file c5ra20403h1.pdf]

## Supporting Information

### Fabrication of Ag/Fe<sub>2</sub>O<sub>3</sub>/ZnO Ternary Composite with Enhanced Photocatalytic Performance

Jia-gen Wu<sup>†</sup>, Ting Fang<sup>†</sup>, Ran Cai, Shao-yang Li, Yue Wang, Cui-e Zhao and Ang Wei \*

As a control, the photo-degradation characteristic of Ag/Fe<sub>2</sub>O<sub>3</sub>/ZnO ternary composite in the dark was investigated. As shown in Fig. S1a, curve 1 and curve 2 of Fig. S1c, the degradation efficiency of Ag/Fe<sub>2</sub>O<sub>3</sub>/ZnO for iodoform and MO were only 9% and 8% after 120 min without illumination, respectively. Under irradiation of simulated sunlight, the degradation efficiency of iodoform and MO were 7% and 6% when without a catalyst (Fig. S1b, curve 3 and curve 4 of Fig. S1c), respectively. The results indicate that the degradation efficiency was mainly attributed to the efficient photo-catalytic of Ag/Fe<sub>2</sub>O<sub>3</sub>/ZnO composites.

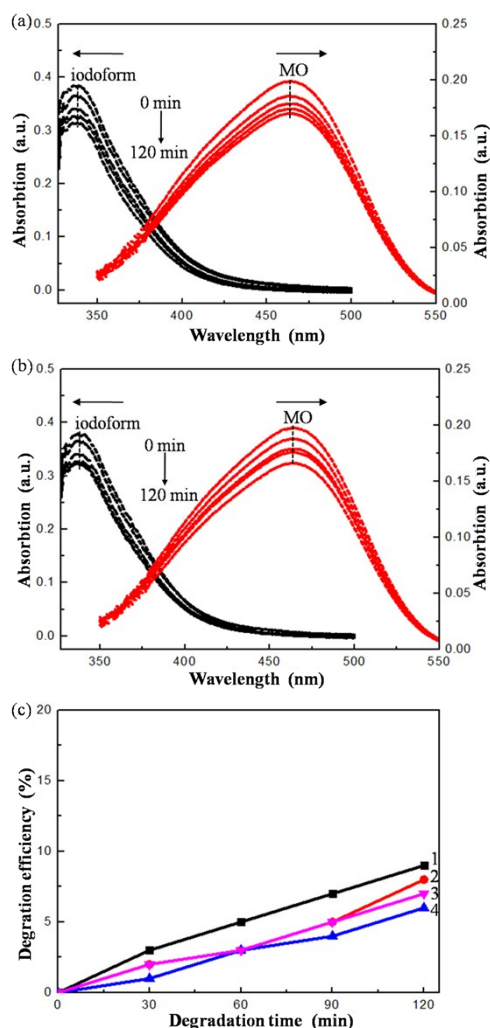

**Fig. S1** Time-dependent absorption spectra of (a) iodoform and MO degraded by Ag/Fe<sub>2</sub>O<sub>3</sub>/ZnO in the dark, (b) iodoform and MO degraded without a catalyst under illumination, and (c) Photo-degradation efficiency of iodoform and MO. The degradation curve of Ag/Fe<sub>2</sub>O<sub>3</sub>/ZnO for iodoform (curve 1), and for MO (curve 2) in the dark; the degradation curve without a catalyst for iodoform (curve 3), and for MO (curve 4) under the irradiation of simulated sunlight.

The mixed pollutants (iodoform, MO and rhodamine B (RhB) solution were mixed, the concentration of iodoform, MO and RhB was  $0.2 \times 10^{-5}$  mol/L,  $0.7 \times 10^{-5}$  mol/L and  $0.5 \times 10^{-5}$  mol/L) was chosen to investigate the selectivity photo-degradation of Ag/Fe<sub>2</sub>O<sub>3</sub>/ZnO ternary composite. Samples of Ag/Fe<sub>2</sub>O<sub>3</sub>/ZnO were put into 30 ml of mixed pollutants solution with irradiation of simulated sunlight, Samples of mixed pollutants solution were taken every 40 min to analyze their ultraviolet absorbance, respectively. The results show that the degradation efficiency of Ag/Fe<sub>2</sub>O<sub>3</sub>/ZnO for iodoform, MO and RhB was 89%, 45% and 40% after 120 min (Fig. S2), indicating

Ag/Fe<sub>2</sub>O<sub>3</sub>/ZnO ternary composite had highly efficient and selective degradation towards iodoform.

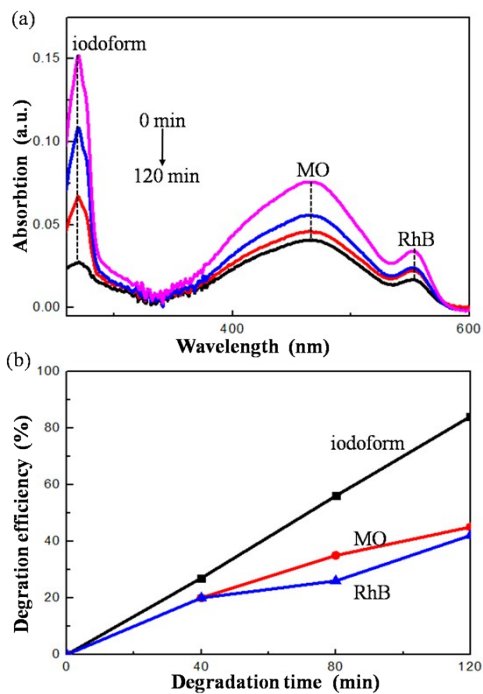

**Fig. S2** (a) Time-dependent absorption spectra of the mixed pollutants degraded by Ag/Fe<sub>2</sub>O<sub>3</sub>/ZnO, (b) Photo-degradation efficiency of the mixed pollutants.
